# Supplementary material for: Implementing a medical student interpreter training program as a strategy to developing humanism
Source: PubMed Central journal article supplement (PMC6006684; doi:10.1186/s12909-018-1254-7), 2018-06-18
Supplement: 12909_2018_1254_MOESM2_ESM.pdf [file 12909_2018_1254_MOESM2_ESM.pdf]

## Part 2 post

The presentation held my interest

- Strongly Agree
- Agree
- Don't Know
- Disagree
- Strongly Disagree

The content, style and pace of this presentation was appropriate

- Strongly Agree
- Agree
- Don't Know
- Disagree
- Strongly Disagree

There was ample time to practice new skills

- Strongly Agree
- Agree
- Don't Know
- Disagree
- Strongly Disagree

Example handouts, and case studies were relevant and easy to understand

- Strongly Agree
- Agree
- Don't Know
- Disagree
- Strongly Disagree

This training increased my understanding of the interpreter's role on the healthcare team

- Strongly Agree
- Agree
- Don't Know
- Disagree
- Strongly Disagree

My ability to facilitate communication between providers and consumers is greater as a result of this training

- Strongly Agree
- Agree
- Don't Know
- Disagree
- Strongly Disagree

My confidence in facilitating communication between providers and consumers is greater as a result of this training

- Strongly Agree
- Agree
- Don't Know
- Disagree
- Strongly Disagree

I still have questions about (please list)

---

I would like more information about (please list)

---

Additional comments

---
