# Supplementary material for: Implementing a medical student interpreter training program as a strategy to developing humanism
Source: PubMed Central journal article supplement (PMC6006684; doi:10.1186/s12909-018-1254-7), 2018-06-18
Supplement: 12909_2018_1254_MOESM3_ESM.pdf [file 12909_2018_1254_MOESM3_ESM.pdf]

## Exam evaluation

My "other" language is \_\_\_\_\_

This was my first experience in interpreting

- Yes  
 No

I had interpreter training prior to this class/practicum

- Yes  
 No

I had opportunities to practice after the training with fellow students

- Yes  
 No

I had opportunities to practice after the training with my professor

- Yes  
 No

other (whom?) \_\_\_\_\_

- Yes  
 No

I had opportunities to interpret in the clinical setting

- Yes  
 No

I estimate that between the class and testing, I practiced

- 5-10 hours total  
 10-20 hours total  
 Other

How much? \_\_\_\_\_

In addition the practicing interpretation, I also

- Worked on medical terms in my other language  
 Worked on my general vocabulary in my other language  
 Engaged in other skill building activities

what? \_\_\_\_\_

The most valuable part of this training has been \_\_\_\_\_

I would add the following to the training \_\_\_\_\_

---



---

### As a result of the training, I feel

confident about interpreting

- more  
 less  
 same

empathy for LEP patients

- more  
 less  
 same

empathy for English-only providers

- more  
 less  
 same

Inclined to advocate for patients

- more  
 less  
 same

Inclined to work for system change

- more
- less
- same

I would recommend this experience to fellow students

- Yes
- No

I would be willing to participate as a coach in future trainings

- Yes
- No
